# Supplementary material for: Risk for Hereditary Neoplastic Syndromes in Women with Mismatch Repair-Proficient Endometrial Cancer
Source: MDPI journal article supplement (doi:10.3390/genes14111999), 2023-10-26
Supplement: s1 [file s1]

**Supplementary Table S1** – Criteria used to categorize the samples in the present study.

| Amsterdam II Criteria                                                                                                                                                                                                                                                                                                                                                                                                                                                                                                                                                                                                                                                                                                                                                                                            |                                                                                                                                                                                                                                                                                                                                                                                                                                                                                                                                                                                           |
|------------------------------------------------------------------------------------------------------------------------------------------------------------------------------------------------------------------------------------------------------------------------------------------------------------------------------------------------------------------------------------------------------------------------------------------------------------------------------------------------------------------------------------------------------------------------------------------------------------------------------------------------------------------------------------------------------------------------------------------------------------------------------------------------------------------|-------------------------------------------------------------------------------------------------------------------------------------------------------------------------------------------------------------------------------------------------------------------------------------------------------------------------------------------------------------------------------------------------------------------------------------------------------------------------------------------------------------------------------------------------------------------------------------------|
| <p>There should be at least 3 relatives with CRC; all the following criteria should be present:</p> <ul style="list-style-type: none"> <li>- One should be a first-degree relative of the other 2</li> <li>- At least 2 successive generations should be affected</li> <li>- At least 1 CRC should be diagnosed before age 50</li> <li>- Familial adenomatous polyposis should be excluded</li> <li>- Tumors should be verified by pathological examination</li> </ul>                                                                                                                                                                                                                                                                                                                                           |                                                                                                                                                                                                                                                                                                                                                                                                                                                                                                                                                                                           |
| Revised Bethesda Criteria                                                                                                                                                                                                                                                                                                                                                                                                                                                                                                                                                                                                                                                                                                                                                                                        |                                                                                                                                                                                                                                                                                                                                                                                                                                                                                                                                                                                           |
| <p>Tumors from individuals should be tested for MSI in the following situations:</p> <ol style="list-style-type: none"> <li>1. Colorectal cancer diagnosed in a patient who is less than 50 years of age.</li> <li>2. Presence of synchronous, metachronous colorectal, or other hereditary nonpolyposis colorectal cancer (HNPCC)-associated tumors, regardless of age.</li> <li>3. Colorectal cancer with the MSI-H histology diagnosed in a patient who is less than 60 years of age.</li> <li>4. Colorectal cancer diagnosed in one or more first-degree relatives with an HNPCC-related tumor, with one of the cancers being diagnosed under age 50 years.</li> <li>5. Colorectal cancer diagnosed in two or more first- or second-degree relatives with HNPCC-related tumors, regardless of age</li> </ol> |                                                                                                                                                                                                                                                                                                                                                                                                                                                                                                                                                                                           |
| Li-Fraumeni                                                                                                                                                                                                                                                                                                                                                                                                                                                                                                                                                                                                                                                                                                                                                                                                      |                                                                                                                                                                                                                                                                                                                                                                                                                                                                                                                                                                                           |
| <p>Classic Li-Fraumeni:<br/>Most common cancers</p> <ul style="list-style-type: none"> <li>• Bone and soft tissue sarcoma</li> <li>• Breast cancer</li> <li>• Brain tumor</li> <li>• Leukemia</li> <li>• Adrenocortical carcinoma</li> </ul> <ul style="list-style-type: none"> <li>- Multiple primary cancers common 50%</li> <li>- cancers diagnosed before 30 years</li> <li>- 28% breast cancers diagnosed before age 30 years and 89% before age 50 years</li> <li>- No excess cancers above population rates beyond age 59 years</li> </ul>                                                                                                                                                                                                                                                                | <p>Li-Fraumeni-like:<br/>Most common cancers</p> <ul style="list-style-type: none"> <li>• Bone and soft tissue sarcoma</li> <li>• Breast cancer</li> <li>• Brain tumor</li> <li>• Leukemia</li> <li>• Adrenocortical carcinoma</li> </ul> <ul style="list-style-type: none"> <li>- Prone to develop multiple primary cancers 63% cancers diagnosed before 30 years</li> <li>- 32% breast cancers diagnosed before age 30 years and 97% before age 50 years</li> <li>- Only 4 of 158 cancers in known or assumed carriers of germline p53 mutations occurred after age 59 years</li> </ul> |
| aFAP                                                                                                                                                                                                                                                                                                                                                                                                                                                                                                                                                                                                                                                                                                                                                                                                             |                                                                                                                                                                                                                                                                                                                                                                                                                                                                                                                                                                                           |
| <ul style="list-style-type: none"> <li>- Patients are clinically defined as having less than 100 synchronous colorectal adenomas.</li> <li>- Present at a later age than patients with classical FAP and develop CRC 10 to 20 years older</li> <li>- May be diagnosed as a single case in a family or, less frequently, it may be present in other family members, and it shows distinct pattern of inheritance.</li> </ul>                                                                                                                                                                                                                                                                                                                                                                                      |                                                                                                                                                                                                                                                                                                                                                                                                                                                                                                                                                                                           |
| HBOC                                                                                                                                                                                                                                                                                                                                                                                                                                                                                                                                                                                                                                                                                                                                                                                                             |                                                                                                                                                                                                                                                                                                                                                                                                                                                                                                                                                                                           |
| <ul style="list-style-type: none"> <li>- Breast cancer at age 45 or younger in women</li> <li>- Breast cancer at age 46–50 or younger in women and at least one close blood relative with breast cancer at any age or limited family history</li> <li>- Triple negative breast cancer at age 60 or younger in women</li> <li>- Breast cancer at any age in men</li> </ul>                                                                                                                                                                                                                                                                                                                                                                                                                                        |                                                                                                                                                                                                                                                                                                                                                                                                                                                                                                                                                                                           |



- Ovarian, fallopian tube, or primary peritoneal cancer
- Cancer in both breasts
- Pancreatic cancer or prostate cancer with Gleason score  $\geq 7$
- Breast, ovarian, pancreatic, or prostate cancer among multiple blood relatives
- Ashkenazi (Eastern European) Jewish ancestry
- A known BRCA mutation in the family
