# Supplementary material for: Risk for Hereditary Neoplastic Syndromes in Women with Mismatch Repair-Proficient Endometrial Cancer
Source: MDPI journal article supplement (doi:10.3390/genes14111999), 2023-10-26
Supplement: s1 [file s1]

**Supplementary Material S1. Primary Screening Questionnaire (Translated from Brazilian Portuguese)**

**Primary Screening Questionnaire**

**Patient name:** \_\_\_\_\_

**Mother's name:** \_\_\_\_\_

**Date of Birth:** \_\_\_\_\_

**ID number:** \_\_\_\_\_

**City and state:** \_\_\_\_\_

**Date:** \_\_\_\_\_

**Q1) Did you have cancer before age 50?**

( ) Yes. What age? \_\_\_\_\_

( ) No

**Q2) Are there among your close family members (parents, siblings, children, grandparents and uncles/aunts) any case of:**

**Breast cancer before age 50:** ( ) Yes ( ) No

**Bowel cancer before age 50:** ( ) Yes ( ) No

**Ovarian cancer before age 50:** ( ) Yes ( ) No

**Q3) Are there, among your close relatives (parents, siblings, children, grandparents and uncles/aunts), 3 or more cases of cancer before the age of 50?**

\_\_\_\_\_
